# Supplementary material for: Vaccinating Children against SARS-CoV-2: A Literature Review and Survey of International Experts to Assess Safety, Efficacy and Perceptions of Vaccine Use in Children
Source: MDPI journal article supplement (doi:10.3390/vaccines11010078), 2022-12-29
Supplement: s1 [file s1]

## Table of Contents

|                                       |          |
|---------------------------------------|----------|
| <b>Search terms and strategy.....</b> | <b>1</b> |
| <b>Prisma Flow charts .....</b>       | <b>2</b> |
| <b>Data items.....</b>                | <b>6</b> |
| <b>Forrest plots .....</b>            | <b>6</b> |

## Search terms and strategy

### Databases searched

The following databases were searched; EMBASE, PubMed, Cochrane and Clinicaltrials.gov. Previous systematic reviews were reviewed, and all included trials were cross-checked against our own search.

### Search terms

The search terms can be seen in table S1.

*Table S1 Search terms used*

| Area                                                                            | Keywords                                                                                                                        |
|---------------------------------------------------------------------------------|---------------------------------------------------------------------------------------------------------------------------------|
| Pediatric trial data – efficacy data                                            | SARS / COVID /CORONA<br>PAEDIATRIC / PEDIATRIC / CHILD* /<br>ADOLESCENCE* / INFANT<br>VACCIN*<br>TRIAL<br>EFFICACY / EFFECTIVE* |
| Pediatric safety data including clinical trials and post-marketing surveillance | SARS / COVID / CORONA<br>PAEDIATRIC / PEDIATRIC / CHILD* /<br>ADOLESCENCE* / INFANT<br>TRIAL<br>VACCIN*<br>SAFE*                |

## Prisma Flow charts

Figure S1 Prisma flow chart - safety

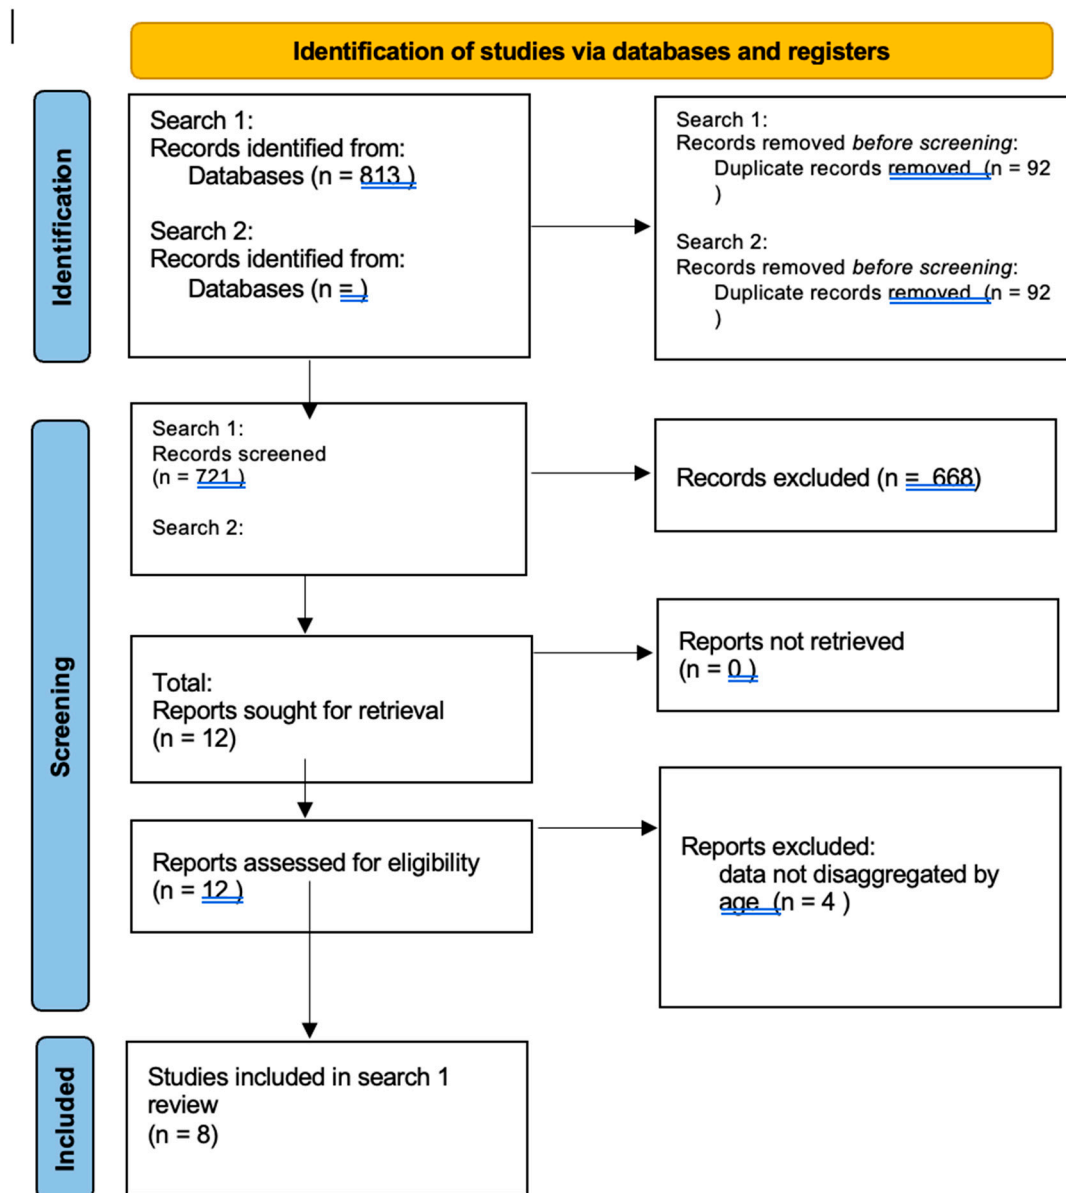

Figure S2: Immunogenicity and Efficacy 1

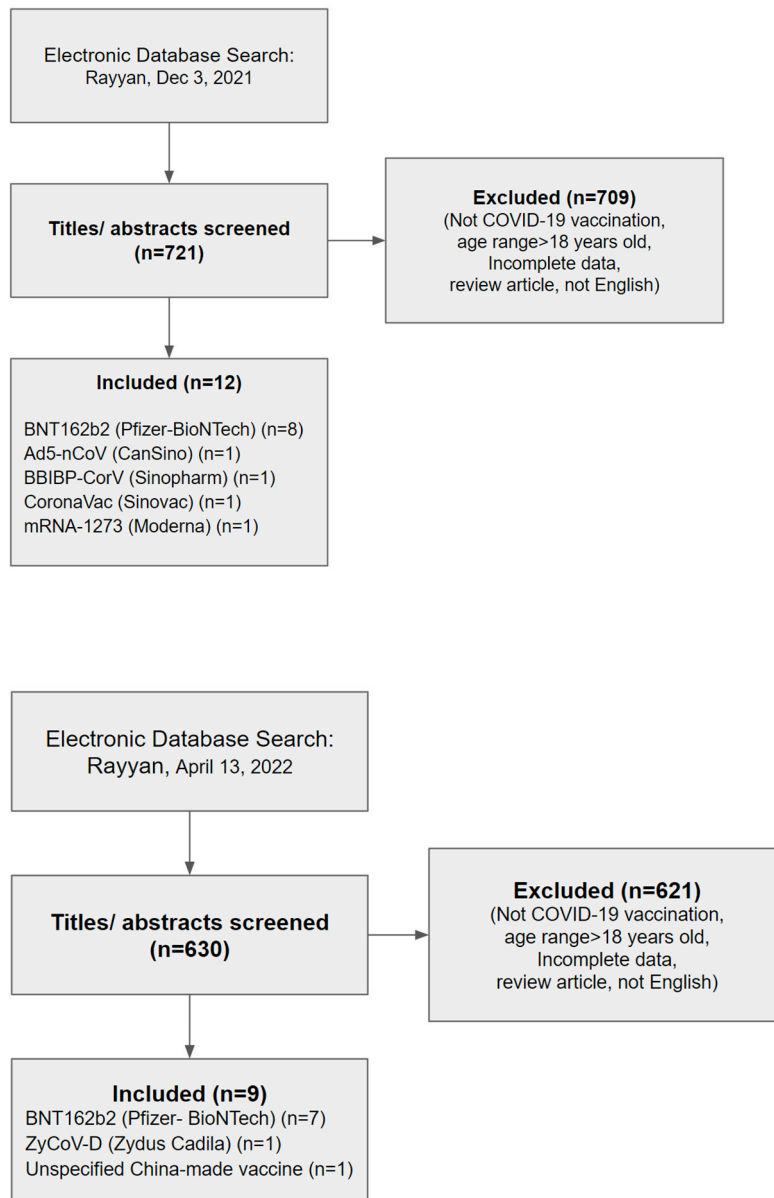

## Data items

The following data were extracted where available for all studies which met inclusion criteria; first author, age of study subjects, study type, intervention measures (vaccine type, number of doses, etc), and trial location.

For studies included in the safety review the following information was also obtained: period of trial (as a rough analogue to predominant circulating SARS-CoV-2 strain), adverse events (including definitions, solicited, unsolicited, and serious). Given the heterogeneity of reported adverse effects, all of those listed in the primary paper and any supplemental material were extracted to allow comparison between studies. Data which was not presented with a numerical count or clear percentage (i.e., a bar chart with no data figures elsewhere in the text) was excluded.

## Forrest plots

Figure S3 Erythema dose 1 and 2

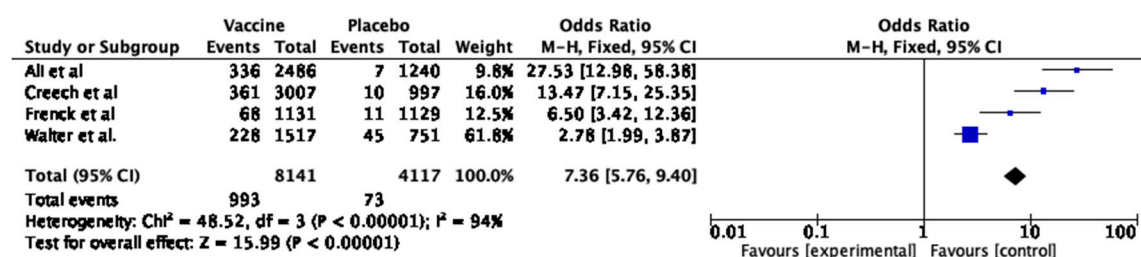

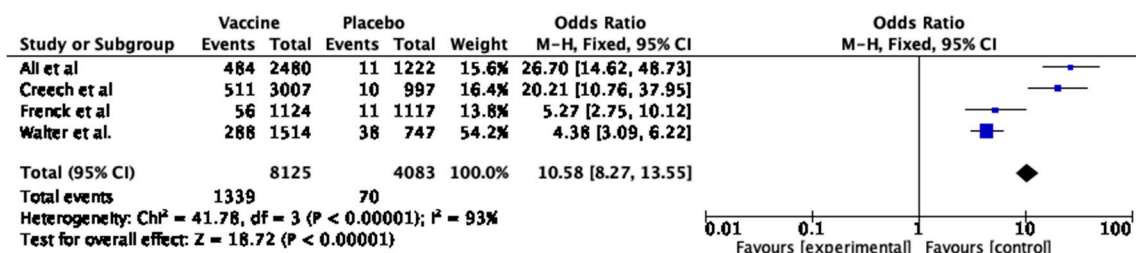

Figure S4 Swelling after dose 1 and 2

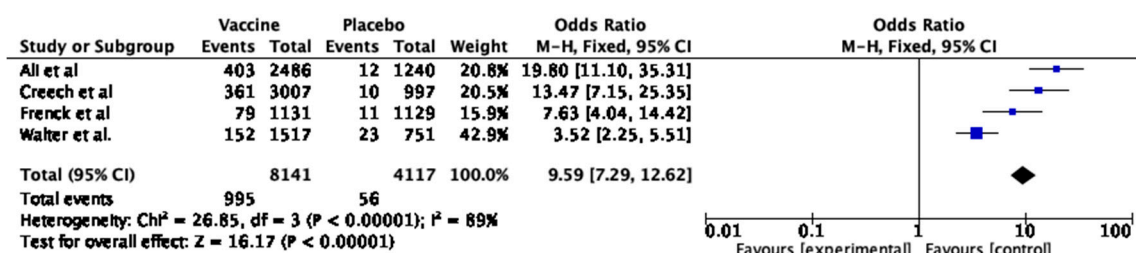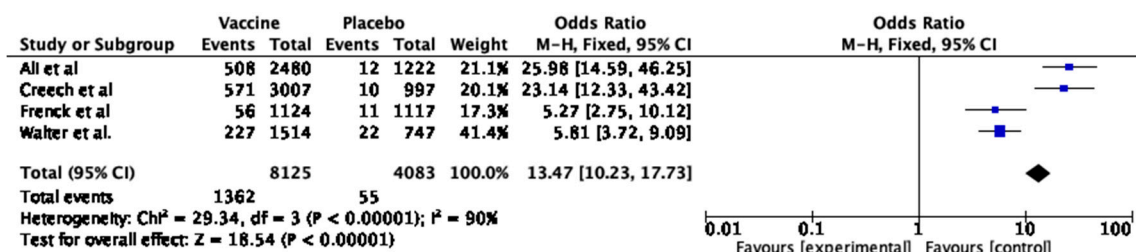

Figure S5 Fatigue after dose 1 and 2

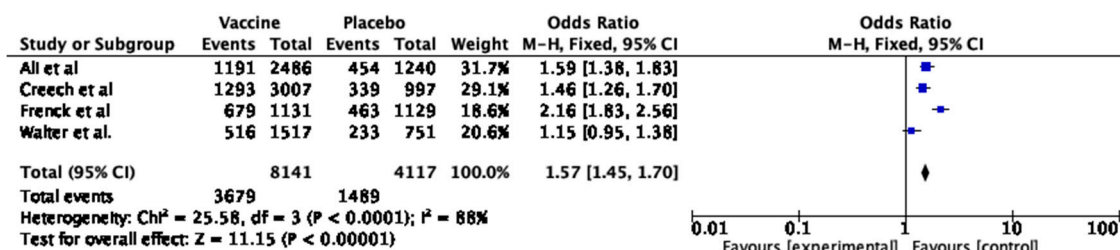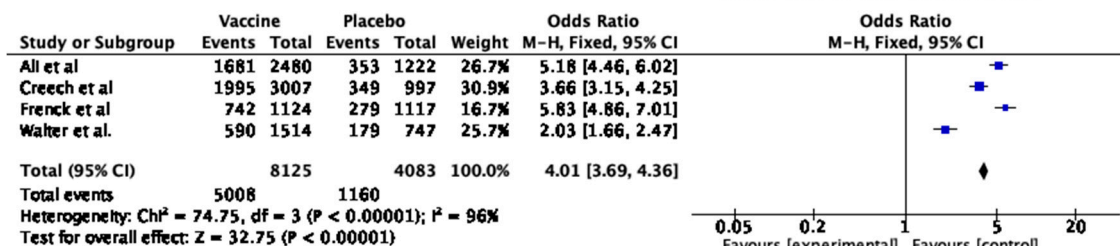

Figure S6 Headache after dose 1 and 2

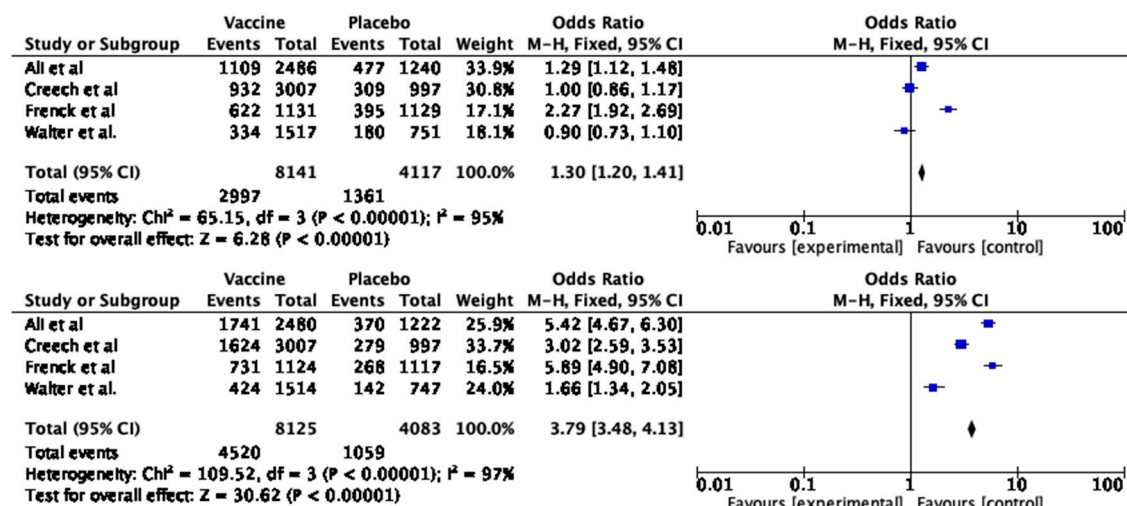

Figure S7 Nausea and vomiting after dose 1 and 2

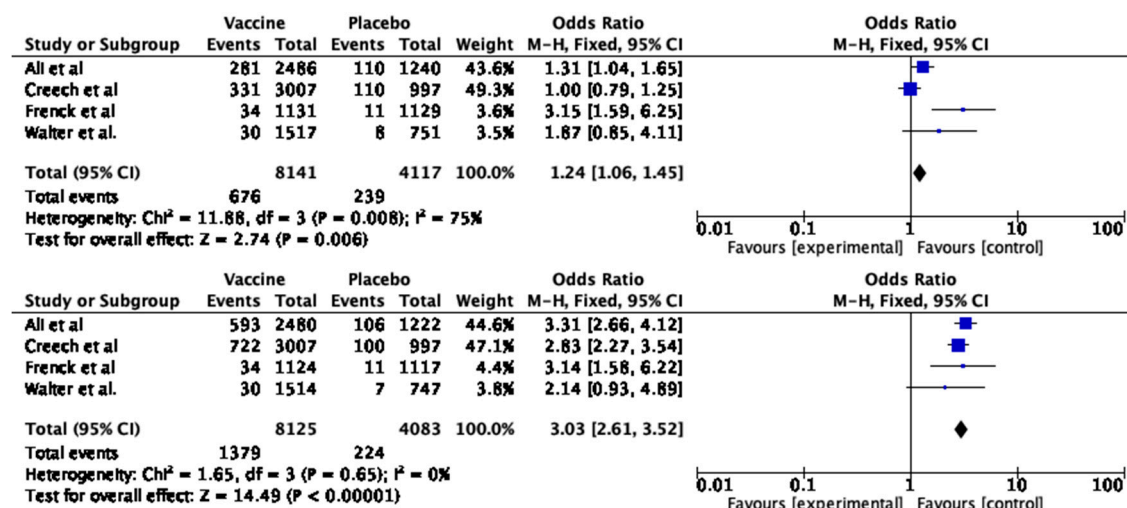

Table S2 Safety databases and surveillance systems

| Name of resource                                                                                                | Year | Vaccine given                                                       | Vaccine type      | Location       | Age of participants                                                                                                                      | Number vaccinated                                                                                                                                   |
|-----------------------------------------------------------------------------------------------------------------|------|---------------------------------------------------------------------|-------------------|----------------|------------------------------------------------------------------------------------------------------------------------------------------|-----------------------------------------------------------------------------------------------------------------------------------------------------|
| COVID-19 Vaccine Safety in Adolescents Aged 12-17 Years - United States, December 14, 2020-July 16, 2021        | 2021 | Pfizer                                                              | RNA               | USA            | 12 to 17                                                                                                                                 | approx 8.9 million                                                                                                                                  |
| COVID-19 Vaccine Safety in Adolescents Aged 12-17 Years - United States, December 14, 2020-July 16, 2021        | 2021 | Pfizer                                                              | RNA               | USA            | 12 to 17                                                                                                                                 | approx 8.9 million                                                                                                                                  |
| Coronavirus vaccine - weekly summary of Yellow Card reporting                                                   | 2022 | Pfizer, AstraZeneca, Moderna                                        | RNA, Viral vector | United Kingdom | <18                                                                                                                                      | First dose: 4.2 million<br>Second dose: 2.8 million                                                                                                 |
| VigAccess                                                                                                       | 2022 | All COVID-19 vaccines, unable to determine vaccine type by database | Mixed             | Worldwide      | Age data broken down into:<br>0-27 days, 28 days to 23 months, 2-11 years, 12-17 years, 18-44 years, 45-64 years, 65-74 years, >75 years |                                                                                                                                                     |
| Reported side effects following COVID-19 vaccination in Canada                                                  | 2022 | Pfizer                                                              | RNA               | Canada         | 5 to 11, 12 to 17                                                                                                                        | 12 to 17 year olds: cumulative number of doses given in this age group:<br>5 to 11 year olds:<br>Number of doses given in this age group: 5,020,764 |
| COVID-19 Vaccines, Overview of National Reporting Experience<br>Publication date: 17 February 2022 (Update #16) | 2022 | Pfizer                                                              | RNA               | Ireland        | 5 to 11, 12 to 17                                                                                                                        | Total 875,000 doses in children between 5-17 years old                                                                                              |
| Adverse events following immunisation with COVID-19 vaccines: Safety Report #45 – 31 August 2022                | 2022 | Pfizer                                                              | RNA               | New Zealand    | 5 to 11, 12+                                                                                                                             | 5-11: Dose 1: 267,314<br>Dose 2: 149,818<br>12 to 19 - data not available, instead data for 12+ presented by:                                       |
| EudraVigilance                                                                                                  | 2022 | Pfizer                                                              | RNA               | EU / EEA       | 0-1 month, 2 months - 2 years, 3-11 years, 12-17 years                                                                                   | Not described in dashboard.                                                                                                                         |
| EudraVigilance                                                                                                  | 2022 | Moderna                                                             | RNA               | EU / EEA       | 0-1 month, 2 months - 2 years, 3-11 years, 12-17 years                                                                                   | Not described in dashboard.                                                                                                                         |
| EudraVigilance                                                                                                  | 2022 | AstraZeneca                                                         | Viral vector      | EU / EEA       | 0-1 month, 2 months - 2 years, 3-11 years, 12-17 years                                                                                   | Not described in dashboard.                                                                                                                         |
| EudraVigilance                                                                                                  | 2022 | Janssen                                                             | Viral vector      | EU / EEA       | 0-1 month, 2 months - 2 years, 3-11 years, 12-17 years                                                                                   | Not described in dashboard.                                                                                                                         |
| Moderna COVID-19 vaccine safety data - Adolescent participants                                                  | 2022 | Moderna                                                             | RNA               | Australia      | <20                                                                                                                                      | Surveys completed:<br>Moderna dose 1: 5,352<br>Moderna dose 2: 4847                                                                                 |
| Pfizer COVID-19 vaccine safety data - Child participants                                                        | 2022 | Pfizer                                                              | RNA               | Australia      | 5 to 11                                                                                                                                  | Surveys complete:<br>Pfizer dose 1: 133,618<br>Pfizer dose 2: 82,340                                                                                |
| Pfizer COVID-19 vaccine safety data - Adolescent participants                                                   | 2022 | Pfizer                                                              | RNA               | Australia      | <20                                                                                                                                      | Surveys completed:<br>Pfizer dose 1: 231,093<br>Pfizer dose 2: 172,002<br>Pfizer dose 3 / booster : 35,155                                          |
| VAERS                                                                                                           | 2022 | Pfizer                                                              | RNA               | USA            |                                                                                                                                          | Not described in dashboard.                                                                                                                         |
| VAERS                                                                                                           | 2022 | Moderna                                                             | RNA               | USA            |                                                                                                                                          | Not described in dashboard.                                                                                                                         |
